# Supplementary material for: Stability of gametocyte-specific Pfs25-mRNA in dried blood spots on filter paper subjected to different storage conditions
Source: PubMed Central journal article supplement (PMC3778852; doi:10.1186/1475-2875-11-138), 2012-04-30

density 0.28 G/ $\mu$ l

Fresh whole blood

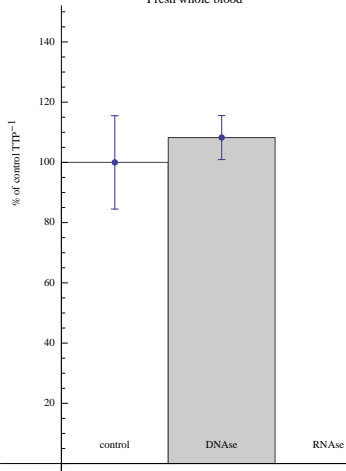

Room temperature day 1

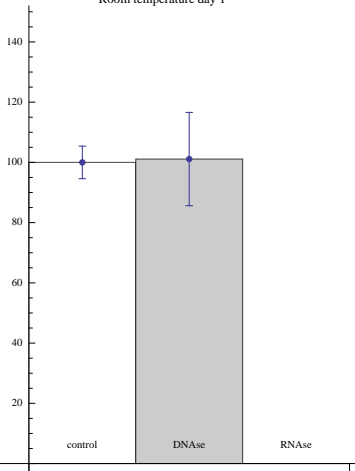

Supplement: 1475-2875-11-138-S2.pdf [file 1475-2875-11-138-S2.pdf]
